# Supplementary material
Source: publisher figshare collection journal article supplement (https://diabetesjournals.figshare.com/articles/dataset/_/13377134)
Supplement: Supplementary file 1 [file 25774136]

Supplemental Table 1: Most parsimonious Fine and Gray model of independent predictors of hospital admission for/with DFU, with age as timeline, in the pooled Fremantle Diabetes Study (FDS) type 2 diabetes cohorts, and the same model with FDS1 vs FDS1 participation added. Subdistribution hazard ratios (sdHR) and 95% confidence intervals (CI) are shown.

|                                                 | sdHR (95% CI)     | <i>P</i> -value | sdHR (95% CI)     | <i>P</i> -value |
|-------------------------------------------------|-------------------|-----------------|-------------------|-----------------|
| Age at diabetes diagnosis (increase of year)    | 0.95 (0.92-0.97)  | <0.001          | 0.95 (0.93-0.98)  | <0.001          |
| Insulin therapy                                 | 3.45 (1.91-6.24)  | <0.001          | 3.16 (1.70-5.89)  | <0.001          |
| Ln(urinary albumin:creatinine ratio (mg/mmol))* | 1.43 (1.21-1.68)  | <0.001          | 1.46 (1.25-1.70)  | <0.001          |
| Height (increase of 1 cm)                       | 1.04 (1.01-1.08)  | 0.007           | 1.04 (1.01-1.08)  | 0.008           |
| History of peripheral revascularization         | 6.98 (2.79-17.46) | <0.001          | 6.06 (2.31-15.92) | <0.001          |
| Any foot pulse absent                           | 2.21 (1.13-4.34)  | 0.021           | 2.70 (1.22-5.95)  | 0.014           |
| Peripheral sensory neuropathy                   | 4.11 (1.86-9.10)  | <0.001          | 3.51 (1.56-7.87)  | 0.002           |
| FDS2 vs FDS1 participation                      |                   |                 | 2.01 (0.91-4.44)  | 0.083           |

\* A 2.72-fold increase in urinary albumin:creatinine ratio corresponds to an increase of 1 in ln (urinary albumin:creatinine ratio)
